# Supplementary material
Source: PubMed Central journal article supplement (PMC7467059)
Supplement: NIHMS1588538-supplement-11060_2020_3517_MOESM1_ESM.pdf [file NIHMS1588538-supplement-11060_2020_3517_MOESM1_ESM.pdf]

## Supplementary Material

| Antibody (flow)          | Clone    | Fluorophore | Dilution | Isotype                            |
|--------------------------|----------|-------------|----------|------------------------------------|
| CD3e                     | 145-2C11 | PE          | 1:40     | Armenian Hamster IgG               |
| CD4                      | RM4-5    | AF647       | 1:333    | Rat IgG2 $\alpha$ κ                |
| CD8a                     | 53-6.7   | BUV737      | 1:40     | Rat IgG2 $\alpha$ κ                |
| CD8b.2                   | 53-5.8   | FITC        | 1:100    | Rat IgG1κ                          |
| CD11b                    | M1/70    | BUV395      | 1:80     | Rat IgG2 $\beta$ κ                 |
| CD11c                    | HL3      | AF700       | 1:40     | Armenian Hamster IgG1, $\lambda$ 2 |
| CD11c                    | HL3      | BUV737      | 1:40     | Armenian Hamster IgG1, $\lambda$ 2 |
| CD19                     | 1D3      | BB515       | 1:40     | Rat IgG2 $\alpha$ κ                |
| CD25                     | PC61     | BV605       | 1:160    | Rat IgG1 $\lambda$                 |
| CD44                     | IM7      | BV421       | 1:80     | Rat IgG2 $\beta$ κ                 |
| CD45                     | 30-F11   | BV785       | 1:160    | Rat IgG2 $\beta$ κ                 |
| CD62L                    | MEL-14   | BUV395      | 1:80     | Rat IgG2 $\alpha$ κ                |
| CD161 (NK1.1)            | PK136    | BUV395      | 1:40     | Mouse IgG2 $\alpha$ κ              |
| CD161 (NK1.1)            | PK136    | BV421       | 1:80     | Mouse IgG2 $\alpha$ κ              |
| CD206 (mannose receptor) | MR5D3    | AF647       | 1:80     | Rat IgG2 $\alpha$                  |
| F4/80                    | BM8      | PerCP/Cy5.5 | 1:200    | Rat IgG2 $\alpha$ κ                |
| Foxp3                    | MF23     | BV421       | 1:80     | Rat IgG2 $\beta$                   |
| IFN- $\gamma$            | XMG1.2   | BV605       | 1:20     | Rat IgG1κ                          |
| IFN- $\gamma$            | XMG1.2   | PE          | 1:80     | Rat IgG1κ                          |
| Ki-67                    | B56      | PerCP/Cy5.5 | 1:40     | Mouse IgG1κ                        |
| Ly-6C                    | AL-21    | PerCP/Cy5.5 | 1:20     | Rat IgMκ                           |
| Ly-6G                    | 1A8      | AF488       | 1:100    | Rat IgG2 $\alpha$ κ                |
| LY-6G                    | 1A8      | BV605       | 1:80     | Rat IgG2 $\alpha$ κ                |
| T-bet                    | 4B10     | AF700       | 1:80     | Mouse IgG1κ                        |
| TNF- $\alpha$            | MP6-XT22 | BV510       | 1:40     | Rat IgG1                           |

| Blocking Antibody           | Clone | Dilution            |
|-----------------------------|-------|---------------------|
| True-Stain Monocyte Blocker | n/a   | 1:20                |
| CD16/32                     | 93    | Rat IgG2 $\alpha$ λ |

| Therapeutic Antibody | Clone   | Dose     |
|----------------------|---------|----------|
| PD-1                 | RMP1-14 | 10 mg/kg |
| CD8                  | 53.6.7  | 10 mg/kg |
| CD4                  | GK1.5   | 10 mg/kg |

*Antibodies bought from BD Bioscience, Biolegend, Invitrogen, eBioscience, Bio X Cell and Novus*

**Supplementary Table 1. Antibodies.** Antibodies used for flow cytometry (clones and dilutions) and therapeutics (clones and dosage)

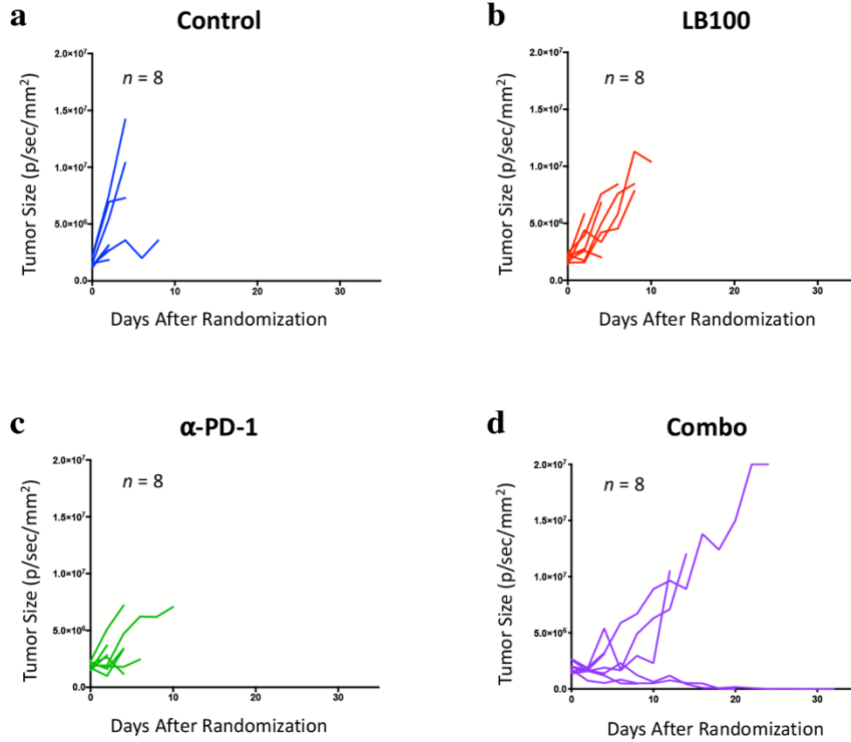

**Supplementary Figure 1. PP2A inhibition and PD1 blockade synergistically elicit tumor rejection in GL261.** Individual tumor growth measured in BLI of the ROI in (a) control (b) LB-100 (c) α-PD-1 and (d) combination groups plotted as days after randomization.

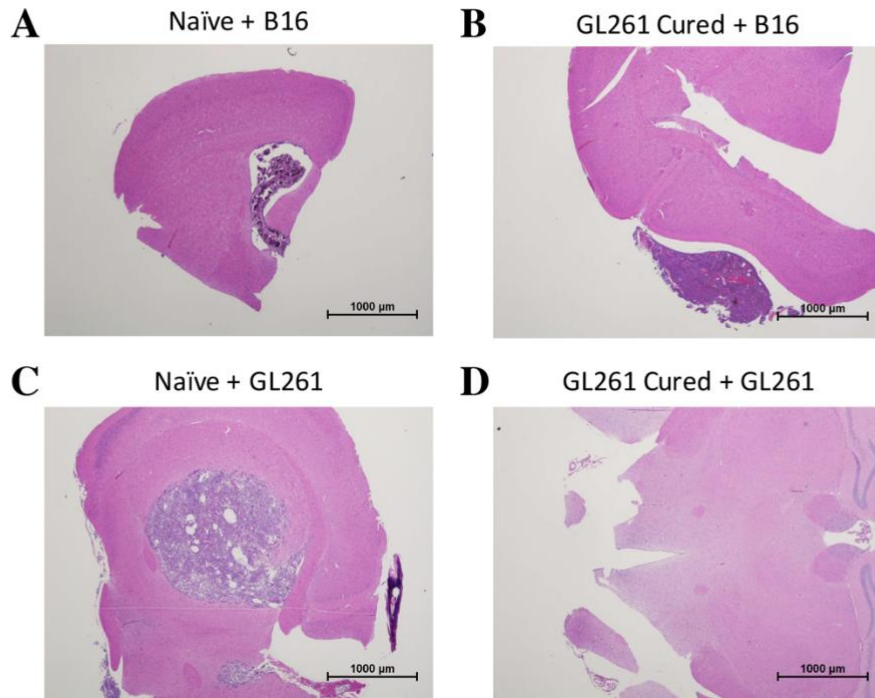

**Supplementary Figure 2. Combination treatment result in a long-term antitumor antigen-specific memory of cured animals.** Representative images of hematoxylin-and-eosin staining of brain specimens from (a) naïve mouse exposed to B16, (b) CR mouse exposed to B16, (c) naïve mouse exposed to GL261 and (d) cured mouse re-exposed to GL261. CR mice re-challenged with GL261 demonstrated no histologic evidence of tumor establishment.

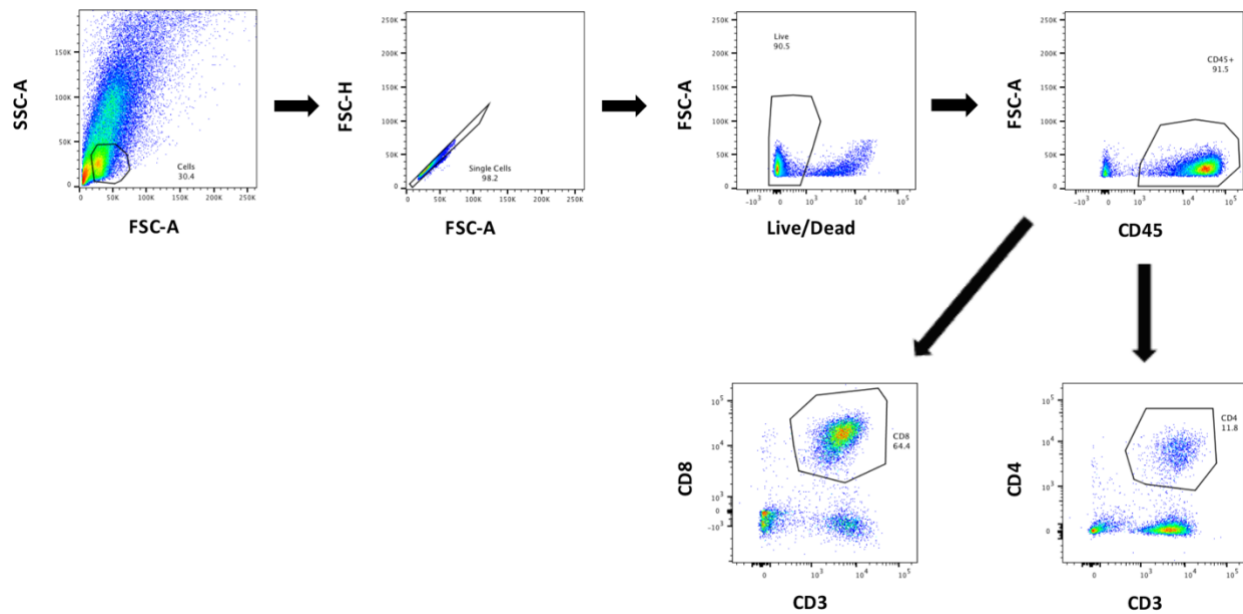

**Supplementary Figure 3. Gating strategy for flow cytometric analysis of tumor infiltrating lymphocytes.** We first used SSC-FSC gate to exclude non-cellular debris, followed by exclusion of duplets by FSC-H-FSA-A gate. Fixable live-dead (L/D) stain was used to exclude dead cells. Live cells were then gated based on expression of CD45+ pan leukocyte marker. CD45- cells were considered as tumor cells. CD45+ cells were then phenotyped further based on CD3, CD8, CD4 expression. CD45+CD3+CD8+ cells were gated as CD8+ lymphocytes, while CD45+CD3+CD4+ cells were gated as CD4+ lymphocytes. Further, staining of the CD4+ and CD8+ subsets were then performed as indicated in the text.

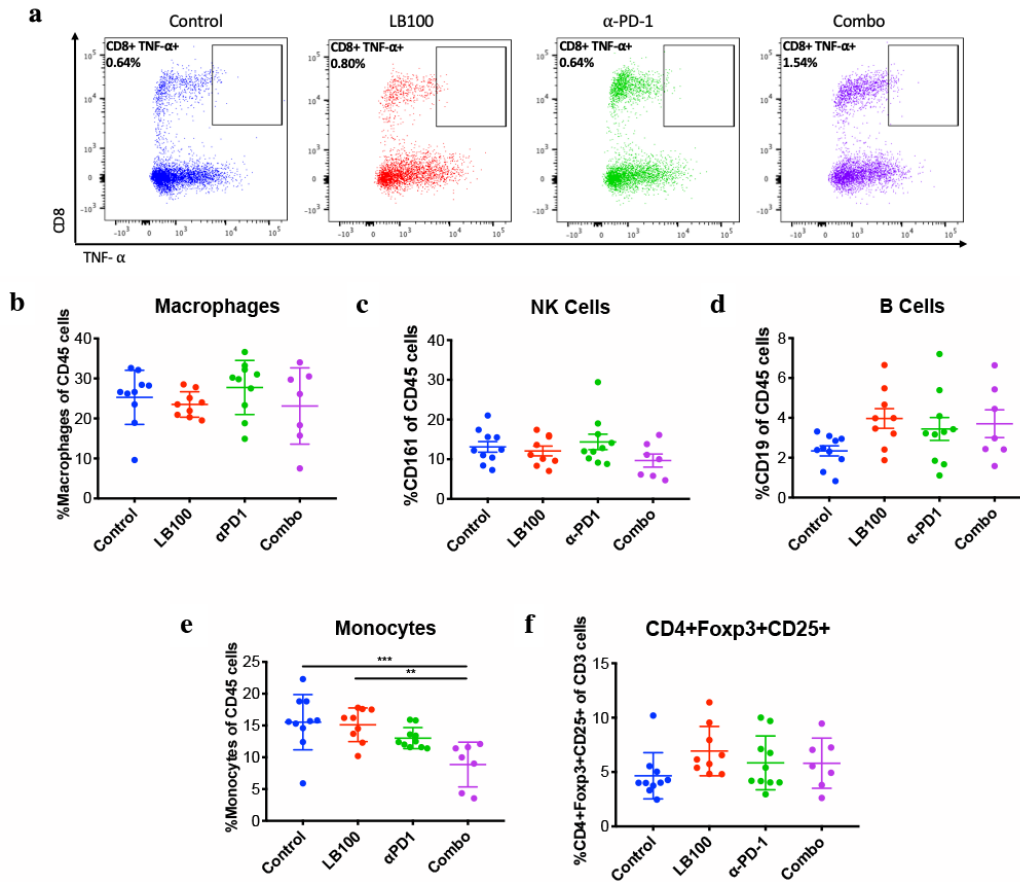

**Supplementary Figure 4. Immune profiling of tumor infiltrating leukocytes.** Combination therapy enhanced CD8+ T cell function but did not alter tumor infiltration of macrophages, natural killer cells or B cells. Monocytes cells were decreased with combination treatment. (a) Representative FACS plots of TNF- $\alpha$ + CD8+ as a percentage of CD45+ cells. (b) Macrophages (CD45+ CD3- CD11c<sup>low</sup> CD11b+ Ly6G- Ly6C<sup>low</sup>) expressed as a percentage of CD45+ cells were not significantly changed in any treatment group. (c) NK (CD45+ CD161+) cells expressed as a percentage of CD45+ cells were not significantly changed in any treatment group. (d) B cells (CD45+ CD19+) expressed as a percentage of CD45+ cells were not significantly changed in any treatment group. (e) Monocytes (CD45+ CD3- CD11c<sup>low</sup> CD11b+ Ly6G- Ly6C<sup>high</sup>) as a percentage of CD45+ cells were significantly decreased in combination compared to control or LB-100 alone. (f) Tregs (FoxP3+ CD25+ CD4+) expressed as a percentage of CD3+ cells were not significantly changed in any treatment group. \*P<0.05 \*\*P<0.01, \*\*\*P<0.001, \*\*\*\*P<0.0001 (one-way ANOVA with Tukey's multiple comparison test). Error bars depict SEM.

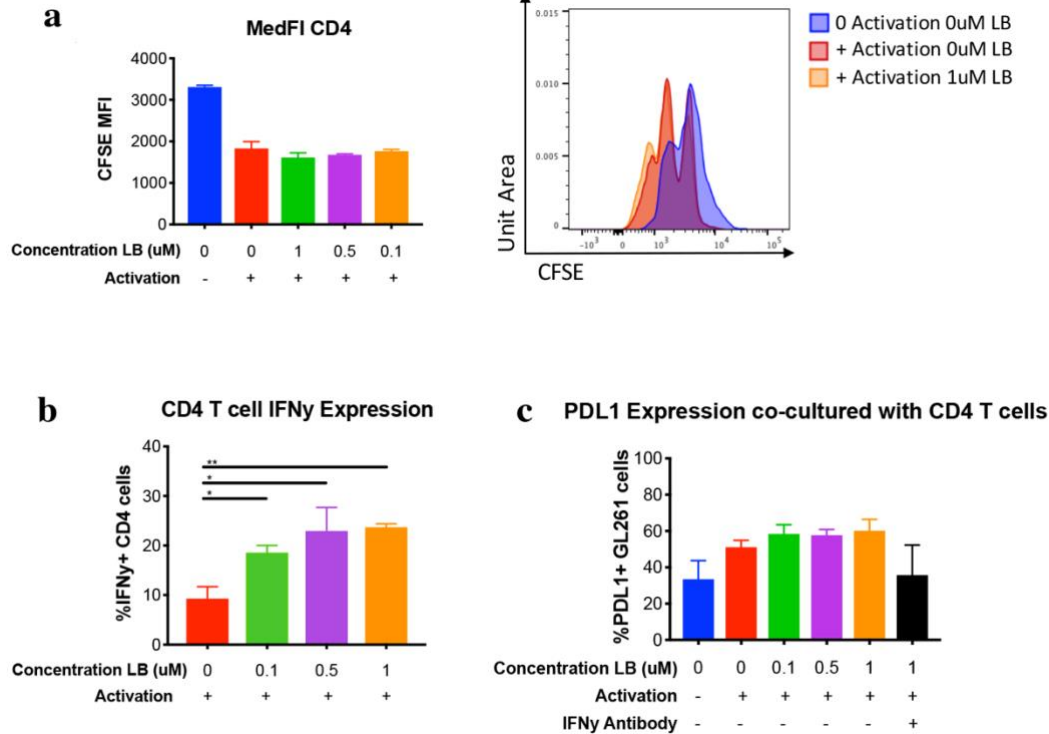

**Supplementary Figure 5. LB-100 enhances IFN-gamma secretion of CD4+ T-cells in vitro.** LB-100 did not alter CD4+ T cell proliferation, but increased CD4+ T cell production of IFN-gamma. There was a trend toward increase in tumor PD-L1 expression. (a) LB-100 did not increase proliferation of CD4+ T cells. Flow cytometry analyzing CFSE cytosolic dye as a marker of CD4+ T cell proliferation 72 hours after activation. Representative FACS histogram. (b) LB-100 increased secretion of IFN-gamma by CD4+ T cells. Flow cytometry analyzing expression of IFN-gamma in CD4+ T cells 72 hours after activation in the presence of LB-100 dose titration. (c) Flow cytometry analyzing PD-L1 expression in tumor cells co-cultured with CD4+ T cells exposed to a titration concentration of LB-100. There was a trend, but insignificant, increase in tumor PD-L1 expression with LB-100 treatment. \* $P < 0.05$  \*\* $P < 0.01$  (one-way ANOVA with Tukey's multiple comparison test). Error bars depict SEM.
